# Supplementary material for: Developing a Model of Graduate Teaching Assistant Teacher Efficacy: How Do High and Low Teacher Efficacy Teaching Assistants Compare?
Source: Atypon-hosted journal article supplement (doi:10.1187/cbe.20-05-0096), 2021-01-14
Supplement: combinedsupmats.pdf [file combinedsupmats.pdf]

# Supplemental Material

*CBE—Life Sciences Education*

Smith and Delgado

## Interview Protocol

- Will you talk about how the semester went for you as a TA?
  - Were you looking forward to this position, why?
    - Is it more of an obligation, why?
  - Good/bad experience, why?
  - What was a typical week like for you in your role as a TA?
- (Explain any changes in responses to survey)
  - What factors might have led to these changes?
- Which tasks were you confident in performing as a TA this semester?
- Did any experiences, observations, or interactions improve your confidence in yourself as an instructor?
  - Which did you find most valuable?
- Please explain any obstacles or difficulties you may have overcome to improve your confidence in yourself as an instructor.
  - Please explain any measures you took to overcome these obstacles or difficulties
  - Is there anything else you can think of that might have improved your confidence?
- How confident were you in your ability to instruct a class at the beginning of the semester?
  - Prior teaching experiences
  - Prior training/developmental courses/seminars
- How would you compare your teaching techniques to those of instructors you have had?
  - Are you confident in your ability to positively influence learning with your techniques?
- Have there been any critical moments or pieces of information that have changed how you think about your teaching?
- What would you attribute your teaching style to?
- Is there any other feedback you want to give regarding your experiences as a TA this semester?
